# Supplementary material
Source: Springer Nature journal article supplement (https://www.springermedizin.de/resource/supplementary/13229_2009_9_MOESM3_ESM.pdf/9676008)

Alignment

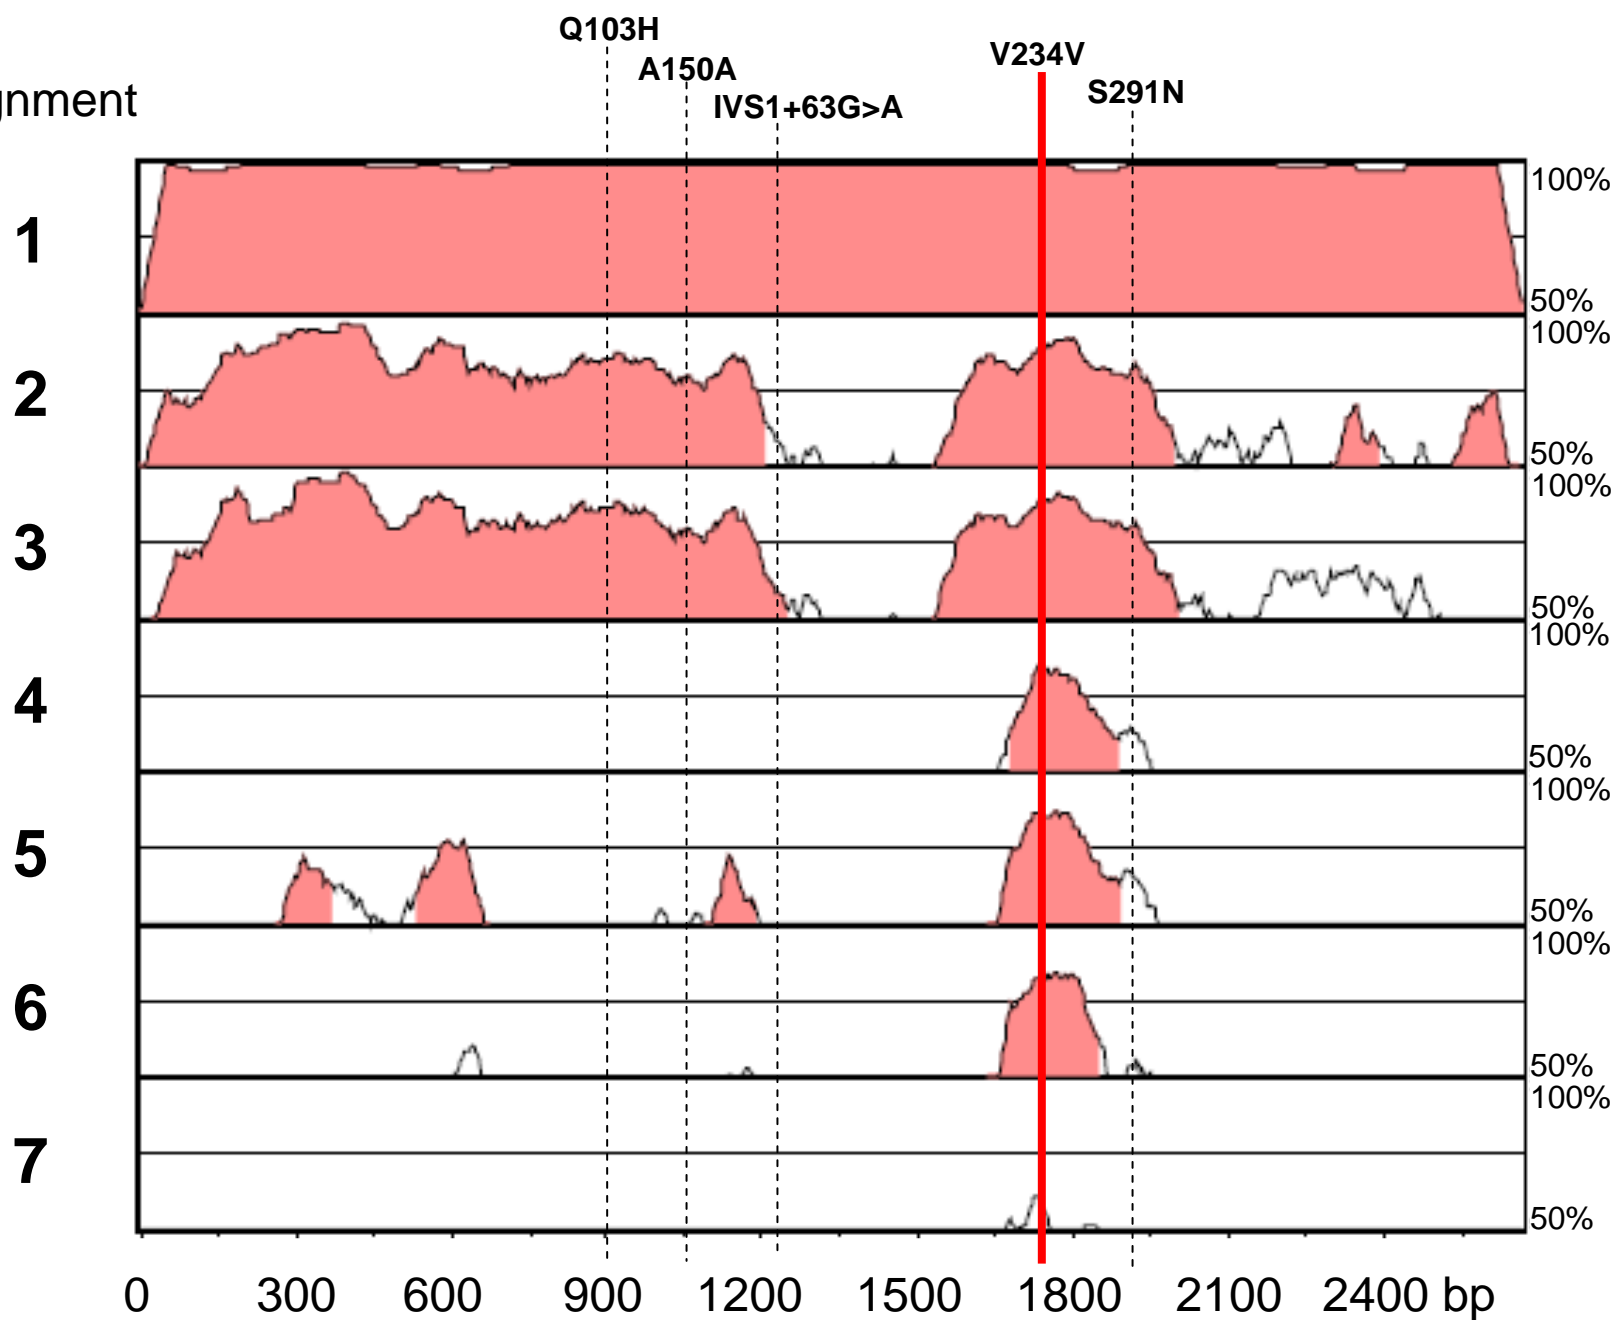

Supplement: MOESM3 [file 9676008]
